# Supplementary material for: An Arabidopsis Oxalyl-CoA Decarboxylase, AtOXC, Is Important for Oxalate Catabolism in Plants
Source: MDPI journal article supplement (doi:10.3390/ijms22063266), 2021-03-23
Supplement: s1 [file s1]

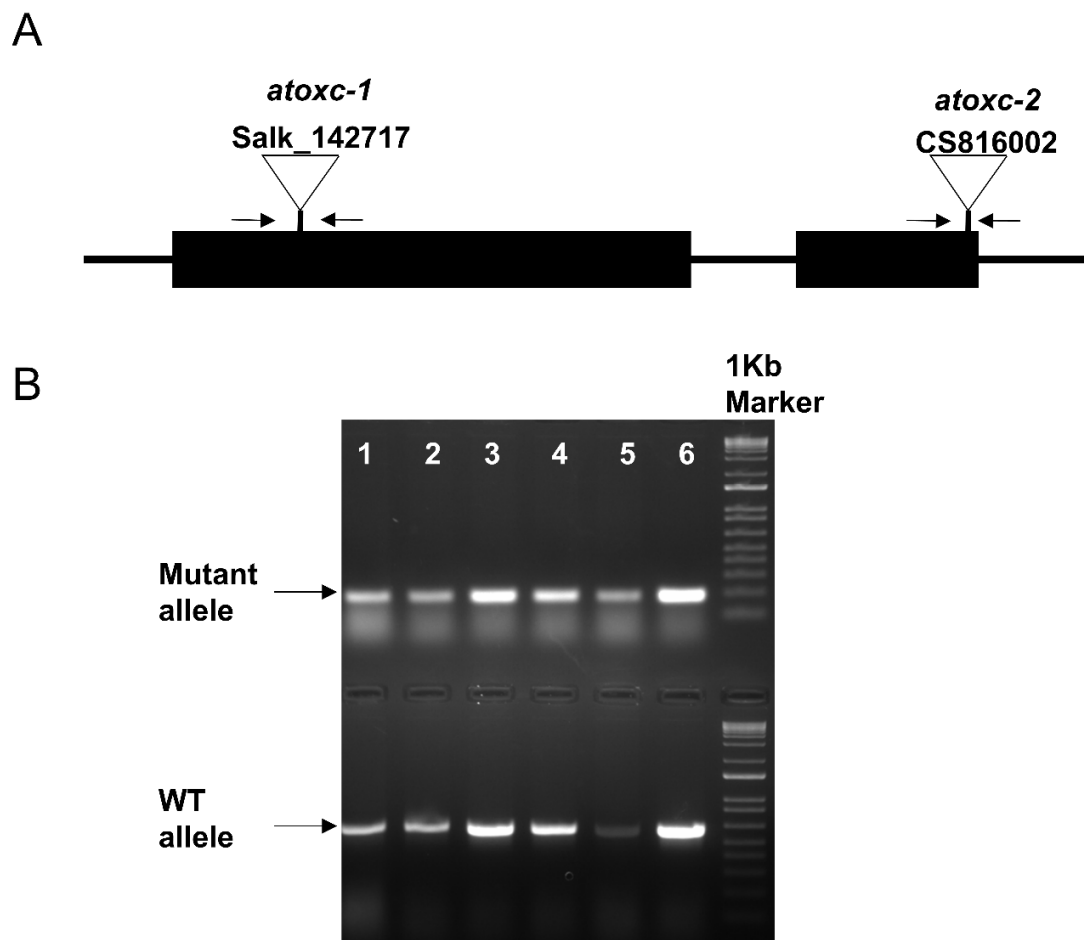

**Figure S1.** Analysis of two T-DNA insertional lines of *AtOXC* gene. **(A)** Diagram indicates the first allele (Salk\_142717) and the second allele (SAIL\_343\_D06) of *AtOXC* T-DNA insertional lines. Arrows indicate the genotyping PCR primers. **(B)** PCR genotyping of Basta resistant individual plants of T3 SAIL\_343\_D06 line, showing all individual plants carry both T-DNA insertion and WT allele.
